1 **Lack of astrocytic glycogen alters synaptic plasticity but not seizure susceptibility**

2  
3 Jordi Duran<sup>1,2\*</sup>, M. Kathryn Brewer<sup>1</sup>, Arnau Hervera<sup>3,4,5,6</sup>, Agnès Gruart<sup>7</sup>, Jose Antonio del  
4 Rio<sup>3,4,5,6</sup>, José M. Delgado-García<sup>7</sup>, Joan J. Guinovart<sup>1,2,8</sup>

5 \*Corresponding author (jordi.duran@irbbarcelona.org)

6  
7 <sup>1</sup>Institute for Research in Biomedicine (IRB Barcelona), The Barcelona Institute of Science  
8 and Technology, Barcelona 08028, Spain

9 <sup>2</sup>Centro de Investigación Biomédica en Red de Diabetes y Enfermedades Metabólicas  
10 Asociadas (CIBERDEM), Madrid 28029, Spain

11 <sup>3</sup>Institute for Bioengineering of Catalonia (IBEC), The Barcelona Institute of Science and  
12 Technology, 08028 Barcelona, Spain

13 <sup>4</sup>Centro de Investigación Biomédica en Red sobre Enfermedades Neurodegenerativas  
14 (CIBERNED), 28031 Madrid, Spain

15 <sup>5</sup>Department of Cell Biology, Physiology and Immunology, Faculty of Biology, University  
16 of Barcelona, 08028 Barcelona, Spain

17 <sup>6</sup>Institute of Neurosciences, University of Barcelona, 08028 Barcelona, Spain

18 <sup>7</sup>Division of Neurosciences, Pablo de Olavide University, Seville, Spain

19 <sup>8</sup>Department of Biochemistry and Molecular Biomedicine, University of Barcelona,  
20 Barcelona 08028, Spain

## 23 ABSTRACT

24

25 Brain glycogen is mainly stored in astrocytes. However, recent studies both *in vitro* and *in*  
26 *vivo* indicate that glycogen also plays important roles in neurons. By conditional deletion of  
27 glycogen synthase (GYS1), we previously developed a mouse model entirely devoid of  
28 glycogen in the central nervous system (GYS1<sup>Nestin-KO</sup>). These mice displayed altered  
29 electrophysiological properties in the hippocampus and increased susceptibility to kainate-  
30 induced seizures. To understand which of these functions is related to astrocytic glycogen,  
31 in the present study we generated a mouse model in which glycogen synthesis is eliminated  
32 specifically in astrocytes (GYS1<sup>Gfap-KO</sup>). Electrophysiological recordings of awake  
33 behaving mice revealed alterations in input/output curves and impaired long-term  
34 potentiation, similar, but to a lesser extent, to those obtained with GYS1<sup>Nestin-KO</sup> mice.  
35 Surprisingly, GYS1<sup>Gfap-KO</sup> mice displayed no change in susceptibility to kainate-induced  
36 seizures as determined by fEPSP recordings and video monitoring. These results confirm  
37 the importance of astrocytic glycogen in synaptic plasticity. (150 words)

38

39 Keywords: glycogen, long-term potentiation, plasticity, epilepsy, astrocyte, metabolism

40

41

## 42 1 INTRODUCTION

43

44 Most cell types in the body store glucose in the form of glycogen, a branched  
45 macromolecule containing up to 55,000 glucose units. The only enzyme able to form  
46 glycogen *in vivo* is glycogen synthase (GYS). There are two isoforms of glycogen synthase  
47 in mammals: the muscle isoform, GYS1, which is expressed in all tissues except the liver,  
48 and the liver-specific isoform, GYS2. In the brain, glycogen is estimated to comprise about  
49 0.1% of tissue weight [1]. Both astrocytes and neurons express GYS1 and synthesize  
50 glycogen, although glycogen levels in astrocytes are much higher than in neurons [2, 3].

51 In the past decades, numerous studies have demonstrated that brain glycogen plays a  
52 role in memory consolidation and synaptic function [reviewed in [4–6]]. In histological  
53 studies of the healthy brain, glycogen granules are almost always confined to astrocytic cell  
54 bodies and processes [7]. Hence, there is a longstanding belief that the contribution of brain  
55 glycogen to cerebral functions is entirely due to its role in astrocytes. However, recent *in*  
56 *vitro* studies suggested an active glycogen metabolism in neurons [2, 8].

57 To study the role of brain glycogen *in vivo*, we previously developed a transgenic  
58 mouse line (GYS1<sup>Nestin-KO</sup>) which lacked GYS1 and thus glycogen throughout the whole  
59 CNS, while GYS1 expression was normal in other tissues. Paired-pulse recordings at the  
60 CA3-CA1 synapse of the hippocampus showed that the GYS1<sup>Nestin-KO</sup> animals displayed  
61 increased facilitation, i.e. an increased response to the second pulse [9, 10]. The GYS1<sup>Nestin-</sup>  
62 <sup>KO</sup> animals also exhibited impaired long-term potentiation (LTP) evoked at the CA3-CA1  
63 synapse. LTP is believed to be a primary molecular mechanism underlying long-term  
64 memory consolidation [9]. Additionally, the animals were more susceptible to hippocampal  
65 seizures induced by kainate or train stimulation [10]. These *in vivo* results demonstrate that  
66 brain glycogen plays a role in both short- and long-term synaptic plasticity as well as in the  
67 prevention of seizures.

68 Since the GYS1<sup>Nestin-KO</sup> mice lacked both glial and neuronal glycogen, the differential  
69 contribution of each glycogen pool to these results could not be determined with this  
70 model. For this reason, we next generated a new model with greater cellular resolution  
71 devoid of GYS1 in a subset of glutamatergic neurons, the excitatory Ca<sup>2+</sup>/calmodulin-  
72 dependent protein kinase 2 (Camk2a)-positive neurons of the forebrain [11], including the  
73 pyramidal cells of the hippocampal CA3-CA1 synapse. Like the GYS1<sup>Nestin-KO</sup>, these  
74 animals presented altered LTP and an associative learning deficiency, although the  
75 impairment was not as pronounced. However, unlike the GYS1<sup>Nestin-KO</sup> mice, GYS1<sup>Camk2a-  
76 KO</sup> mice exhibited no statistically significant change in PPF and no difference in  
77 susceptibility to kainate-induced seizures. This study corroborated the presence of an active  
78 glycogen metabolism in neurons *in vivo* and illustrated the importance of neuronal  
79 glycogen in LTP. However, since only a subset of neurons was affected in this model, it  
80 remains unclear whether the differences between the GYS1<sup>Nestin-KO</sup> and GYS1<sup>Camk2a-KO</sup> lines  
81 are due to the lack of astrocytic glycogen and/or glycogen in another subtype of neuron.

82 In the present study, we generated a new mouse model, lacking GYS1 specifically in  
83 astrocytes (GYS1<sup>Gfap-KO</sup>). Our results clarify the specific contribution of astrocytic glycogen  
84 to cerebral function, confirming its role in synaptic plasticity and discarding its role in the  
85 prevention of epileptic seizures.

86

## 87 2 METHODS

88

### 89 2.1 Animals

90 Male and female mice aged 4 ± 1 months were used in this study. All experiments  
91 were carried out following European Union (2010/63/EU) and Spanish (BOE 34/11370-  
92 421, 2013) regulations for the use of laboratory animals. In addition, all experimental  
93 protocols were approved by the Ethics Committee of the Pablo de Olavide University.  
94 Animals were kept in collective cages (up to five animals per cage) on a 12-h light/dark  
95 cycle with constant temperature (21 ± 1°C) and humidity (50 ± 5%). After  
96 electrophysiological studies were initiated, mice were kept in individual cages until the end  
97 of the experiments. Animals were allowed access *ad libitum* to commercial mouse chow  
98 and water. The Gfap-Cre transgenic line 77.6 used in this study was purchased from  
99 Jackson laboratories (Stock #024098) and has been thoroughly characterized [12].

100

### 101 2.2 Biochemical analysis

102 Mice were euthanized by cervical dislocation and decapitation, and the brains were  
103 removed and hemisected. The cerebellum, hippocampus and cortex from each hemisphere  
104 were then dissected and frozen in liquid nitrogen. Samples were maintained at -80 °C until  
105 use. Tissue lysates for Western blot were prepared as previously described [11] and sample  
106 protein content was determined by Bradford assay (BioRad). Lysates were loaded in 10%  
107 polyacrylamide gels and transferred to Immobilon membranes (Millipore) for Western blot.  
108 The following antibodies were used: anti-glycogen synthase (Cell Signaling cat# 3886) and  
109 anti-GFAP (Millipore cat# MAB360). The REVERT total protein stain was used as a  
110 loading control and densitometry was performed using Image Studio<sup>TM</sup> Lite (LI-COR  
111 BioSciences).

112

### 113 **2.3 Animal preparation for the electrophysiological study**

114 For electrode implantation, animals were anesthetized with 0.8–3% halothane from a  
115 calibrated Fluotec 5 (Fluotec-Ohmeda, Tewksbury, MA, USA) delivered via a homemade  
116 mask and vaporizer at a flow rate of 0.8 L/min oxygen. Briefly, animals were implanted  
117 with bipolar stimulating electrodes at the right Schaffer collaterals of the dorsal  
118 hippocampus and with a recording electrode in the ipsilateral CA1 area using stereotaxic  
119 coordinates [13]. Electrodes were made of 50  $\mu\text{m}$  Teflon-coated tungsten wire (Advent  
120 Research Materials Ltd., Eynsham, England). The final location of the CA1 recording  
121 electrode was determined electrophysiologically, as described by some of us [11, 14].  
122 Stimulating, recording and ground wires were soldered to a 6-pin socket. The socket was  
123 fixed to the skull with the help of three small screws and dental cement [11, 14].

124

### 125 **2.4 Input/output curves and LTP procedures**

126

127 Both input/output curves, paired-pulse facilitation (PPF), and LTP were evoked in  
128 behaving mice following procedures described elsewhere [11, 14]. For the  
129 electrophysiological study, the mouse was located in a small ( $5 \times 5 \times 5$  cm) box, aimed to  
130 avoid over walking. For input/output curves, mice were stimulated at the CA3-CA1  
131 synapse with single pulses of increasing intensities (0.02–0.4 mA). PPF was determined by  
132 applying double pulses with increasing inter-pulse intervals (10, 20, 40, 100, 200 and 500  
133 ms) at a fixed intensity corresponding to  $\sim 40\%$  of asymptotic values, as previously  
134 described [11]. Evoked field excitatory post-synaptic potentials (fEPSPs) were recorded  
135 with Grass P511 differential amplifiers, across a high impedance probe ( $2 \times 10^{12} \Omega$ ; 10 pF),  
136 and with a bandwidth of 0.1 Hz-10 kHz (Grass-Telefactor, West Warwick, RI, USA).

137 For LTP measurements, baseline fEPSP values evoked at the CA3-CA1 synapse were  
138 collected 15 min prior to LTP induction using single 100  $\mu\text{s}$ , square, biphasic pulses. Pulse  
139 intensity was set well below the threshold for evoking a population spike (0.15-0.25 mA);  
140 i.e., 30–40% of the intensity necessary for evoking a maximum fEPSP response [14, 15].  
141 LTP was evoked with a high-frequency stimulus (HFS) protocol consisting of five 200 Hz,  
142 100-ms trains of pulses at a rate of 1/s, repeated six times, at intervals of 1 min. The  
143 stimulus intensity during the HFS protocol was set at the same value as that used for  
144 generating baseline recordings to prevent the presentation of electroencephalographic  
145 seizures and/or large population spikes. After each HFS session, the same stimuli were  
146 presented individually every 20 s for 60 additional min and for 30 min on the following  
147 three days [11, 14]. Evoked fEPSPs were recorded as described above.

148

### 149 **2.5 Induction of hippocampal seizures with kainate injections in implanted mice**

150

151 Following procedures described elsewhere [16], we determined the propensity of  
152 control and GYS1<sup>Gfap-KO</sup> mice to generate convulsive seizures in the hippocampal area. For  
153 this, we intraperitoneally (i.p.) administrated the AMPA/kainate receptor agonist kainate (8  
154 mg/kg; Sigma, St. Louis, MO, USA) dissolved in 0.1 M phosphate buffered saline (PBS)  
155 pH = 7.4. Local field potentials and electrically evoked fEPSPs were recorded in the  
156 hippocampal CA1 area from 5 min before to 60 min after kainate injections.

157

### 158 **2.6 Video monitoring of seizures after kainate injections**

159 Animals were placed in individual cages and were administered with three consecutive  
160 i.p. injections of kainate (8 mg/kg per dose, 24 mg/kg total) one every 30 min from the  
161 onset of the experiment in order to induce convulsive non-lethal seizures. Seizure stages  
162 after kainate injections were evaluated as described previously [17–19]. After the first  
163 kainate injections, the animals developed hypoactivity and immobility (Stage I–II). After  
164 successive injections, hyperactivity (Stage III) and scratching (Stage IV) were often  
165 observed. Some animals progressed to a loss of balance control (Stage V) and further  
166 chronic whole-body convulsions (Stage VI). Extreme behavioural manifestations such as,  
167 uncontrolled hopping activity, or “popcorn behaviour” and continuous seizures (more than  
168 1 minute without body movement control) were included in Stage VI. All behavioural  
169 assessments were performed blind to the experimental group (genotype) in situ, as well as  
170 recorded and reanalysed blind to the first analysis. Analysis consisted in the record of the  
171 time spent until the onset of the first seizure, the number of seizures per animal, the time  
172 spent on each grade, as well as the maximum grade reached by each animal.  
173

## 174 **2.7 Data collection and statistical analysis**

175 fEPSPs and 1-V rectangular pulses corresponding to brain stimulation were stored  
176 digitally on a computer through an analog/digital converter (CED 1401 Plus, CED,  
177 Cambridge, England). Data were analyzed off-line for fEPSP recordings with the help of  
178 the Spike 2 (CED) program. Five successive fEPSPs were averaged, and the mean value of  
179 the amplitude (in mV) was determined. Computed results were processed for statistical  
180 analysis using the IBM SPSS Statistics 18.0 (IBM, Armonk, NY, United States). Data are  
181 represented as the mean  $\pm$  SEM. Statistical significance of differences between groups was  
182 inferred by Two-way repeated measures ANOVA, followed by the Holm-Sidak method for  
183 all pairwise multiple comparison procedures. The Fisher exact test for data collected from  
184 kainate experiments. Statistical significance was set at  $P < 0.05$ . For the biochemical  
185 analyses and behavioral assessment of seizure susceptibility after kainate administration,  
186 computed results were processed for statistical analysis with PRISM 8.0 (GraphPAD  
187 Software, San Diego, USA). Data are represented as the mean  $\pm$  SEM. Normality of the  
188 distributions was checked via the Shapiro–Wilk test; All tests performed were two-sided.  
189 Statistical significance of differences between groups was inferred by Student’s t-Test or  
190 Two-way ANOVA, followed by the Bonferroni post-hoc comparison for all pairwise  
191 multiple comparison procedures. Statistical significance was set at  $P < 0.05$ .

## 192 **3 RESULTS**

### 193 **3.1 Generation of GYS1<sup>Gfap-KO</sup> mice**

194 GFAP is a cytoskeletal protein found in nearly all astrocytes and a common marker for  
195 this cell type. The astrocyte-specific inactivation of *Gys1* was achieved by crossing mice  
196 homozygous for the conditional *Gys1* allele [9] with mice expressing Cre recombinase  
197 under the control of the *Gfap* promoter [12]. Littermates that were homozygous for the  
198 conditional *Gys1* allele and negative for Cre recombinase expression were used as controls.  
199 To confirm the inactivation of *Gys1*, we measured GYS1 protein levels in cortex,  
200 hippocampus, and cerebellum by Western blot. GYS1 protein was greatly diminished in all  
201 regions (Fig. 1a). Quantification by densitometry showed that GYS1 expression was

202 reduced by approximately 80% in the cortex and in the hippocampus, and 60% in the  
203 cerebellum (Fig. 1b). Total brain glycogen was decreased by more than 80% (Fig. 1c),  
204 which is consistent with the reduction in GYS1 protein. No changes in GFAP levels were  
205 observed (Fig. 1a, quantification not shown).

206

### 207 **3.2 Electrophysiological alterations at the CA3-CA1 synapse in GYS1<sup>Gfap-KO</sup> mice**

208 To study the consequences of the lack of astrocytic glycogen on synaptic function, we  
209 performed recordings of input/output curves, PPF and LTP evoked at the CA3-CA1  
210 synapse of the hippocampus (Fig. 2a). In a first experimental step, we examined the  
211 response of CA1 pyramidal neurons to single pulses of increasing intensity (0.02–04 mA)  
212 presented to the ipsilateral Schaffer collaterals. Both control and GYS1<sup>Gfap-KO</sup> mice  
213 presented similar increases in the amplitude of fEPSPs evoked at CA1 pyramidal neurons  
214 by the stimuli presented to Schaffer collaterals (Fig. 2b). These two input/output  
215 relationships were best fitted by sigmoid curves ( $r \geq 0.9$ ;  $P \leq 0.001$ ; not illustrated),  
216 suggesting the normal functioning of the CA3-CA1 synapse in both groups. However, the  
217 experimental group reached lower maximal fEPSP amplitudes than their littermate controls.  
218 No significant differences [Two-way repeated measures ANOVA;  $F_{(19,266)} = 1.222$ ;  $P =$   
219  $0.239$ ] were observed overall between control and GYS1<sup>Gfap-KO</sup> groups. However, fEPSPs  
220 evoked by three increasing intensities presented significant differences (All pairwise  
221 multiple comparison procedures;  $P < 0.05$ ). We also performed an analysis of PPF at the  
222 CA3-CA1 synapse by applying double pulses at a fixed intensity with increasing inter-  
223 stimulus intervals (10, 20, 40, 100, 200, 500 ms). Both groups displayed facilitation at 20  
224 and 40 ms intervals (Fig. 2c). GYS1<sup>Gfap-KO</sup> exhibited no statistical difference in PPF  
225 compared to control animals [Two-way repeated measures ANOVA;  $F_{(5,95)} = 0.726$ ;  $P =$   
226  $0.606$ ].

227 In a following experimental step, we evoked LTP at the CA3-CA1 synapse of the two  
228 genotypes as an indication of long-term synaptic plasticity. It is well known that the  
229 hippocampus is involved in the acquisition of different types of associative [20, 21] and  
230 non-associative [22, 23] learning tasks and that the CA3-CA1 synapse is often selected for  
231 evoking LTP in behaving mice [14, 24]. For baseline values, animals were stimulated every  
232 20 s for  $\geq 15$  min at the implanted Schaffer collaterals (Fig. 2d). Afterward, they were  
233 presented with a high frequency stimulus (HFS) protocol. Immediately after the HFS  
234 session, the same single stimulus used to generate baseline records was presented at the  
235 initial rate (3/min) for another 60 min. As illustrated in Fig. 2d, recording sessions were  
236 repeated for three additional days (30 min each). The control group presented a significant  
237 LTP when comparing baseline values with those collected following the HFS session  
238 (Holm-Sidak method, all pairwise multiple comparison procedures;  $P \leq 0.041$ ). Although  
239 the amplitude of fEPSPs also increased in GYS1<sup>Gfap-KO</sup> mice following the HFS session,  
240 only a tendency was presented ( $P \geq 0.671$ ) (Fig. 2d). In addition, the amplitude of fEPSPs  
241 evoked in the control group was significantly [Two-way repeated measures ANOVA;  
242  $F_{(32,512)} = 6.277$ ;  $P < 0.001$ ] larger and longer lasting than that evoked in the experimental  
243 group (Fig. 2d). In summary, GYS1<sup>Gfap-KO</sup> mice display no change in PPF but a  
244 significantly impaired LTP compared to the littermate controls.

245

### 246 **3.3 Seizure susceptibility in GYS1<sup>Gfap-KO</sup> mice**

247 Kainate is a widely used chemoconvulsant used to study seizure susceptibility in  
248 rodents [25]. We previously demonstrated that mice devoid of cerebral glycogen  
249 ( $GYS1^{Nestin-KO}$ ) are more susceptible to kainate-induced seizures [10]. To understand the  
250 participation of astrocytic glycogen in seizure susceptibility, we also assessed the response  
251 of  $GYS1^{Gfap-KO}$  mice to kainate-induced seizures in the pre-implanted animals. Evoked  
252 seizures in control and  $GYS1^{Gfap-KO}$  mice presented similar durations and profiles (Fig. 3a).  
253 Both groups presented a noticeable depression in the amplitude of evoked fEPSP recorded  
254 following a kainate-dependent seizure (Fig. 3b). Overall, there was no difference in the  
255 number of seizures observed per genotype (Fisher exact test;  $P = 0.657$ ) (Fig. 3c).

256 To corroborate these results, we employed an alternative seizure assessment protocol in  
257 a new cohort of mice. Mice were given three kainate injections (8 mg/kg, i.p. every 30 min)  
258 and video-recorded for 180 minutes to monitor their behavior (i.e. epileptic events)  
259 following the first injection. Mice from both genotypes reached similar severity stages (Fig.  
260 4a). In the majority of the mice of both genotypes, seizures began approximately 15  
261 minutes after the third dose of kainate ( $P = 0.9501$ , Student's t-test; Fig. 4b). There were no  
262 significant differences between groups in the priority stage (the behavioral stage in which  
263 an animal spends the most time after kainate administration throughout the duration of the  
264 experiment) ( $P = 0.5441$ , Student's t-test; Fig. 4c) nor the maximum stage (the most severe  
265 stage reached during the experiment) ( $P = 0.9644$ , Student's t-test; Fig. 4d). Furthermore,  
266 there were no significant differences in the time spent per stage (Two-way ANOVA: Stage  
267 factor:  $P = 0.0007$ , Genotype factor:  $P = 0.2370$ ; Fig. 4e) or in the number of seizures per  
268 animal after each injection (Two-way ANOVA: Administration factor:  $P < 0.0001$ ,  
269 Genotype factor:  $P = 0.7980$ ; Fig. 4f). These results unequivocally confirmed that  
270  $GYS1^{Gfap-KO}$  animals present a similar seizure susceptibility compared to control  
271 littermates.

272

## 273 4 DISCUSSION

274

275 In this study, we analyze for the first time the physiological consequences of removing  
276 glycogen specifically from astrocytes by means of transgenic tools. By comparing this  
277 mouse to previous models lacking glycogen in the entire CNS [9, 10] or only in Camk2a-  
278 positive excitatory neurons of the forebrain [11], we are able to define the specific  
279 physiological roles of glycogen in astrocytes versus neurons.

280 Using Cre/Lox technology, we deleted *Gys1* in GFAP-positive cells to eliminate only  
281 astrocytic glycogen synthesis. Western blot analyses confirmed a clear reduction in *GYS1*  
282 protein levels in hippocampus, cortex and cerebellum of  $GYS1^{Gfap-KO}$  mice (Fig. 1, a and  
283 b). Total brain glycogen content was also greatly reduced relative to littermate controls  
284 (Fig. 1c). These results are consistent with the well-documented observation that the  
285 majority of brain glycogen is stored in astrocytes, but also point to a remaining significant  
286 fraction of non-astrocytic *GYS1* expression and glycogen synthesis, likely in neurons.

287 We also studied synaptic function in the  $GYS1^{Gfap-KO}$  model via stimulation of the  
288 CA3-CA1 synapse in the hippocampus. Input/output curves showed no overall significant  
289 difference between groups, but at some intensities, evoked fEPSPs were statistically higher  
290 in the control group compared to the  $GYS1^{Gfap-KO}$  animals, and the latter group reached a  
291 lower maximum fEPSP (Fig. 2b). These results suggest that the absence of astrocytic  
292 glycogen may reduce basal synaptic strength. A similar situation is obtained with inhibitors

293 of astrocytic glutamate transport, which also reduce basal EPSPs since the accumulation of  
294 glutamate causes presynaptic inhibition [26]. Astrocytes take up synaptic glutamate and  
295 convert it to glutamine for transfer to neurons, where it is recycled into glutamate and  
296 repackaged into synaptic vesicles, a process known as the glutamate/glutamine cycle [27,  
297 28]. Since astrocytic glycogen has been shown to play a role in both glutamate uptake and  
298 recycling [29, 30], the lack of astrocytic glycogen could cause impaired glutamate uptake  
299 leading to presynaptic inhibition and therefore lower synaptic strength. While PPF  
300 experiments with increasing inter-pulse intervals showed significantly greater facilitation in  
301  $GYS1^{Nestin-KO}$  mice [10], in the present study,  $GYS1^{Gfap-KO}$  mice only lack astrocytic  
302 glycogen displayed only a trend toward increased PPF, with no statistical difference (Fig.  
303 2c). PPF is typically attributed to presynaptic mechanisms such as increased  $[Ca^{2+}]$  in the  
304 presynaptic terminal [31]. The altered PPF observed in  $GYS1^{Nestin-KO}$  mice could be  
305 exclusively neuronal in origin.

306 We also observed an impairment in hippocampal LTP in  $GYS1^{Gfap-KO}$  animals (Fig.  
307 2d). However, the LTP impairment in the  $GYS1^{Gfap-KO}$  animals was not as pronounced as  
308 was observed in the  $GYS1^{Nestin-KO}$  mice [9]. The present results are reminiscent of those  
309 from the  $GYS1^{Camk2a-KO}$  mice, in which LTP was still observed, although it was  
310 significantly impaired [11]. Collectively, these three mouse models demonstrate that both  
311 astrocytic and neuronal glycogen contribute to LTP. Previous studies using  
312 pharmacological agents have shown that astrocytic glycogen is important for long-term, but  
313 not short-term, memory formation [32, 33]. The presence of a normal PPF, a measure of  
314 short-term plasticity, and the major impairment in LTP that we observed in the  $GYS1^{Gfap-KO}$   
315 model are consistent with these observations.

316 The most surprising result regarding the  $GYS1^{Gfap-KO}$  line is its susceptibility to  
317 kainate-induced epilepsy. We previously showed that  $GYS1^{Nestin-KO}$  mice were more  
318 susceptible to seizures induced by a single convulsive dose of kainate (8mg/kg, i.p.) [10].  
319 However, using the same protocol, we detected no statistical difference in the  $GYS1^{Gfap-KO}$   
320 line (Fig. 3). Utilizing a second experimental protocol with three consecutive doses of  
321 kainate (8mg/kg, i.p., every 30 minutes) we found no statistical differences between the  
322 groups in the seizure stages achieved (Fig. 4a), seizure onset (Fig. 4b), priority or  
323 maximum stage reached (Fig. 4, c and d), time spent per stage (Fig. 4e) or number of  
324 seizures per animal (Fig. 4f). These results unequivocally show that  $GYS1^{Gfap-KO}$  animals  
325 are not more susceptible to kainate than their littermate controls. Altered glycogen  
326 metabolism has been linked to seizures, as reviewed elsewhere [34–37]. A commonly held  
327 view is that altered astrocytic glycogen metabolism induces neuronal excitability via  
328 impaired glutamate and  $K^+$  uptake. However, herein we show mice lacking astrocytic  
329 glycogen do not have more kainate-induced seizures. Since  $GYS1^{Camk2-KO}$  mice also show  
330 unaltered kainate susceptibility [11], collectively these mouse models suggest that seizure  
331 susceptibility in the  $GYS1^{Nestin-KO}$  line is a consequence of the lack of glycogen in another  
332 cell type. Inhibitory neurons play a critical role in suppressing excitability, and their  
333 dysfunction is associated with epilepsy in rodent models and humans [38]. Therefore, our  
334 results suggest that glycogen in inhibitory neurons might be critical for their regulatory  
335 role. This possibility will be addressed in future studies.

336 In summary, the  $GYS1^{Gfap-KO}$  mouse model illustrates the specific contribution of  
337 astrocytic glycogen to the physiological roles of glycogen in the brain, further clarifying  
338 how brain glycogen is involved in memory and epilepsy. Our results confirm that astrocytic  
339 glycogen plays an active role in long-term synaptic plasticity. However, the lack of



340 astrocytic glycogen does not increase susceptibility to kainate-induced seizures in these  
341 mice. These data point to a role of neuronal glycogen in cerebral functions, most  
342 importantly in the regulation of excitability. A thorough understanding of these processes is  
343 essential for better management and treatment of neurological disorders.

344

## 345 **Figure Legends**

346

347 **Fig. 1** Analysis of GYS1, GFAP and glycogen levels in  $GS^{Gfap-KO}$  mice and controls. (a)  
348 Representative Western blot of GYS1 and GFAP protein levels in cortex (Cx),  
349 hippocampus (Hp) and cerebellum (Cb). REVERT protein stain (Li-COR BioSciences) was  
350 used as a loading control. (b) Quantification of GYS1 and GFAP protein levels by region  
351 normalized to total protein determined by REVERT. (c) Total brain glycogen in control  
352 versus  $GS^{Gfap-KO}$  animals. All data are expressed as average  $\pm$ SEM ( $n = 4-6$  per group).  
353 Significant differences were calculated using student's t-test (\*,  $P < 0.05$ ; \*\*\*,  $P < 0.001$ ;  
354 \*\*\*\*,  $P < 0.0001$ ).

355

356 **Fig. 2** Electrophysiological properties of hippocampal synapses in behaving control and  
357  $GYS1^{Gfap-KO}$  mice. (A) Animals were chronically implanted with bipolar stimulating (St.)  
358 electrodes in the right CA3 Schaffer collaterals and with a recording (Rec.) electrode in the  
359 ipsilateral CA1 area. DG, dentate gyrus; Sub., subiculum. (B) Input/output curves of  
360 fEPSPs evoked at the CA3-CA1 synapse via single pulses of increasing intensities (0.02–  
361 0.4 mA) in control and  $GYS1^{Gfap-KO}$  mice. Although no significant differences [Two-way  
362 repeated measures ANOVA;  $F_{(19,266)} = 1.222$ ;  $P = 0.239$ ] were observed between groups,  
363 fEPSPs evoked by three different intensities presented significant differences (All pairwise  
364 multiple comparison procedures;  $P < 0.05$ ). (C) Paired-pulse facilitation in control and  
365  $GYS1^{Gfap-KO}$  animals with increasing inter-stimulus intervals. No significant differences  
366 between the two groups were observed [Two-way repeated measures ANOVA;  $F_{(5,95)} =$   
367  $1.222$ ;  $P = 0.606$ ]. (D) LTP evoked at the CA3-CA1 synapse of control and  $GYS1^{Gfap-KO}$   
368 mice following the HFS session. The HFS was presented after 15 min of baseline  
369 recordings, at the time marked by the dashed line. LTP evolution was followed for four  
370 days. At the right are illustrated representative examples of fEPSPs collected from control  
371 and  $GYS1^{Gfap-KO}$  mice at the times indicated in the bottom graph. fEPSP amplitudes are  
372 given as a percentage of values measured from baseline recordings, and statistical  
373 differences between control and  $GYS1^{Gfap-KO}$  from two-way repeated measures ANOVA  
374 are shown (\*,  $P \leq 0.01$ ). All data are expressed as average  $\pm$  SEM ( $n = 7-9$  mice/group).

375

376 **Fig. 3** Kainate susceptibility of  $GYS1^{Gfap-KO}$  mice compared to controls. (a) Representative  
377 examples of hippocampal seizures evoked in control and  $GYS1^{Gfap-KO}$  mice following the  
378 administration of 8 mg/kg i.p. of kainate. (b) Representative examples of fEPSPs evoked  
379 before and immediately after a kainate-evoked seizure. (c) Percentage of control ( $n = 14$ )  
380 and  $GYS1^{Gfap-KO}$  ( $n = 9$ ) mice presenting spontaneous seizures at the CA1 area during the  
381 recording period (60 min). No significant differences between groups (Fisher exact test;  $P$   
382  $= 0.657$ ) were observed.

383

384 **Fig. 4** Comparison of kainate-induced seizure profile in control and  $GYS1^{Gfap-KO}$ . 3-4  
385 months old mice were subjected to three kainate injections (8 mg/kg every 30 min) and  
386 epileptic responses were analyzed for 180 minutes after the first injection. (a) Percentage of

387 mice reaching seizure stages I to VI and kainate-induced mortality. (b) Onset of the  
388 epileptic activity. Student's t-test ( $P = 0.9501$ ). (c) Priority stage displayed by each  
389 animal during the course of the experiment. Student's t-test ( $P = 0.5441$ ). (d) Maximum  
390 stage reached by each animal during the course of the experiment. Student's t-test ( $P =$   
391  $0.9644$ ). (e) Percentage of time spent on each stage during the course of the experiment.  
392 Two-way ANOVA (Stage factor:  $P = 0.0007$ ; Genotype factor:  $P = 0.2370$ ). (f) Number of  
393 seizures experimented per animal divided on time segments after the first, second and third  
394 kainate administrations. Two-way ANOVA (Administration factor:  $P < 0.0001$ ; Genotype  
395 factor:  $P = 0.7980$ ). All data are expressed as average  $\pm$  SEM ( $n = 6-7$  mice/group).

396

## 397 **AUTHOR CONTRIBUTIONS**

398

399 JD and JJG conceived the study. JD generated and maintained the  $GYS1^{Gfap-Cre}$  line. JD and  
400 MKB collected brain tissues and performed biochemical analyses. AG and JMD-G  
401 performed electrophysiological studies before and after single kainate injections. AH and  
402 JAR performed seizure video-monitoring with multiple kainate injections. All authors  
403 analyzed data and contributed to the writing of the manuscript.

404

## 405 **CONFLICT OF INTEREST**

406

407 All authors declare they have no conflicts of interest.

408

## 409 **ACKNOWLEDGEMENTS**

410

411 We thank Anna Adrover, Emma Veza, Anna Guitart and the IRB Histopathology  
412 Facility for technical assistance and Laura Alcaide, Vanessa Hernandez, María Sánchez  
413 Enciso and José M. González Martín for their help in animal handling and care. We also  
414 thank Olga Varea for helpful advice and discussions.

415

416 IRB Barcelona and IBEC are recipients of a Severo Ochoa Award of Excellence from  
417 MINECO (Government of Spain). This study was supported by grants from the MINECO  
418 (BFU2017-82375-R to AG and JMD-G, RTI2018-099773-B-I00 to JADR and AH and  
419 BFU2017-84345-P to JD and JG), the CIBER de Diabetes y Enfermedades Metabólicas  
420 Asociadas (ISCIII, Ministerio de Ciencia e Innovación), and a grant from the National  
421 Institutes of Health (NIH NINDS P01NS097197) to JG. The project also received funding  
422 from “la Caixa” Foundation (ID 100010434) under the agreement  
423 LCF/PR/HR19/52160007 with JADR. MKB has received funding from the European  
424 Union's Horizon 2020 research and innovation program under the Marie Skłodowska-Curie  
425 grant agreement No. 754510.

426 **REFERENCES**

- 427 1. Brown AM (2004) Brain glycogen re-awakened. *J Neurochem* 89:537–552.  
428 <https://doi.org/10.1111/j.1471-4159.2004.02421.x>
- 429 2. Saez I, Duran J, Sinadinos C, et al (2014) Neurons Have an Active Glycogen  
430 Metabolism that Contributes to Tolerance to Hypoxia. *J Cereb Blood Flow Metab*  
431 34:945–955. <https://doi.org/10.1038/jcbfm.2014.33>
- 432 3. Rubio-Villena C, Viana R, Bonet J, et al (2018) Astrocytes: new players in  
433 progressive myoclonus epilepsy of Lafora type. *Human Molecular Genetics* 27:1290–  
434 1300. <https://doi.org/10.1093/hmg/ddy044>
- 435 4. Gibbs ME (2016) Role of Glycogenolysis in Memory and Learning: Regulation by  
436 Noradrenaline, Serotonin and ATP. *Front Integr Neurosci* 9:.  
437 <https://doi.org/10.3389/fnint.2015.00070>
- 438 5. Alberini CM, Cruz E, Descalzi G, et al (2018) Astrocyte glycogen and lactate: New  
439 insights into learning and memory mechanisms. *Glia* 66:1244–1262.  
440 <https://doi.org/10.1002/glia.23250>
- 441 6. Duran J, Guinovart JJ (2015) Brain glycogen in health and disease. *Molecular Aspects*  
442 *of Medicine* 46:70–77. <https://doi.org/10.1016/j.mam.2015.08.007>
- 443 7. Oe Y, Akther S, Hirase H (2019) Regional Distribution of Glycogen in the Mouse  
444 Brain Visualized by Immunohistochemistry. *Adv Neurobiol* 23:147–168.  
445 [https://doi.org/10.1007/978-3-030-27480-1\\_5](https://doi.org/10.1007/978-3-030-27480-1_5)
- 446 8. Schulz A, Sekine Y, Oyeyemi MJ, et al (2020) The stress-responsive gene  
447 *GDPGP1/mcp-1* regulates neuronal glycogen metabolism and survival. *J Cell Biol*  
448 219:.. <https://doi.org/10.1083/jcb.201807127>
- 449 9. Duran J, Saez I, Gruart A, et al (2013) Impairment in Long-Term Memory Formation  
450 and Learning-Dependent Synaptic Plasticity in Mice Lacking Glycogen Synthase in  
451 the Brain. *J Cereb Blood Flow Metab* 33:550–556.  
452 <https://doi.org/10.1038/jcbfm.2012.200>
- 453 10. López-Ramos JC, Duran J, Gruart A, et al (2015) Role of brain glycogen in the  
454 response to hypoxia and in susceptibility to epilepsy. *Front Cell Neurosci* 9:.  
455 <https://doi.org/10.3389/fncel.2015.00431>
- 456 11. Duran J, Gruart A, Varea O, et al (2019) Lack of Neuronal Glycogen Impairs Memory  
457 Formation and Learning-Dependent Synaptic Plasticity in Mice. *Front Cell Neurosci*  
458 13:374. <https://doi.org/10.3389/fncel.2019.00374>
- 459 12. Gregorian C, Nakashima J, Le Belle J, et al (2009) *Pten* Deletion in Adult Neural  
460 Stem/Progenitor Cells Enhances Constitutive Neurogenesis. *Journal of Neuroscience*  
461 29:1874–1886. <https://doi.org/10.1523/JNEUROSCI.3095-08.2009>

- 462 13. Franklin KBJ, Paxinos G (2008) *The mouse brain in stereotaxic coordinates*, 3. ed.  
463 Elsevier, AP, Amsterdam
- 464 14. Gruart A (2006) Involvement of the CA3-CA1 Synapse in the Acquisition of  
465 Associative Learning in Behaving Mice. *Journal of Neuroscience* 26:1077–1087.  
466 <https://doi.org/10.1523/JNEUROSCI.2834-05.2006>
- 467 15. Gureviciene I, Ikonen S, Gurevicius K, et al (2004) Normal induction but accelerated  
468 decay of LTP in APP + PS1 transgenic mice. *Neurobiology of Disease* 15:188–195.  
469 <https://doi.org/10.1016/j.nbd.2003.11.011>
- 470 16. Valles-Ortega J, Duran J, Garcia-Rocha M, et al (2011) Neurodegeneration and  
471 functional impairments associated with glycogen synthase accumulation in a mouse  
472 model of Lafora disease. *EMBO Mol Med* 3:667–681.  
473 <https://doi.org/10.1002/emmm.201100174>
- 474 17. Carulla P, Bribián A, Rangel A, et al (2011) Neuroprotective role of PrP<sup>C</sup> against  
475 kainate-induced epileptic seizures and cell death depends on the modulation of JNK3  
476 activation by GluR6/7–PSD-95 binding. *MBoC* 22:3041–3054.  
477 <https://doi.org/10.1091/mbc.e11-04-0321>
- 478 18. Rangel A, Madroñal N, Massó AG i., et al (2009) Regulation of GABAA and  
479 Glutamate Receptor Expression, Synaptic Facilitation and Long-Term Potentiation in  
480 the Hippocampus of Prion Mutant Mice. *PLoS ONE* 4:e7592.  
481 <https://doi.org/10.1371/journal.pone.0007592>
- 482 19. Rangel A, Burgaya F, Gavín R, et al (2007) Enhanced susceptibility of Prnp-deficient  
483 mice to kainate-induced seizures, neuronal apoptosis, and death: Role of  
484 AMPA/kainate receptors. *Journal of Neuroscience Research* 85:2741–2755.  
485 <https://doi.org/10.1002/jnr.21215>
- 486 20. Thompson RF (2005) In Search of Memory Traces. *Annu Rev Psychol* 56:1–23.  
487 <https://doi.org/10.1146/annurev.psych.56.091103.070239>
- 488 21. Gruart A, Leal-Campanario R, López-Ramos JC, Delgado-García JM (2015)  
489 Functional basis of associative learning and its relationships with long-term  
490 potentiation evoked in the involved neural circuits: Lessons from studies in behaving  
491 mammals. *Neurobiology of Learning and Memory* 124:3–18.  
492 <https://doi.org/10.1016/j.nlm.2015.04.006>
- 493 22. Clarke JR, Cammarota M, Gruart A, et al (2010) Plastic modifications induced by  
494 object recognition memory processing. *Proceedings of the National Academy of*  
495 *Sciences* 107:2652–2657. <https://doi.org/10.1073/pnas.0915059107>
- 496 23. Moser EI, Moser M-B, McNaughton BL (2017) Spatial representation in the  
497 hippocampal formation: a history. *Nat Neurosci* 20:1448–1464.  
498 <https://doi.org/10.1038/nn.4653>

- 499 24. Bliss TV, Collingridge GL (2013) Expression of NMDA receptor-dependent LTP in  
500 the hippocampus: bridging the divide. *Mol Brain* 6:5. [https://doi.org/10.1186/1756-](https://doi.org/10.1186/1756-6606-6-5)  
501 6606-6-5
- 502 25. Lévesque M, Avoli M (2013) The kainic acid model of temporal lobe epilepsy.  
503 *Neuroscience & Biobehavioral Reviews* 37:2887–2899.  
504 <https://doi.org/10.1016/j.neubiorev.2013.10.011>
- 505 26. Oliek SHR (2001) Control of Glutamate Clearance and Synaptic Efficacy by Glial  
506 Coverage of Neurons. *Science* 292:923–926. <https://doi.org/10.1126/science.1059162>
- 507 27. McKenna MC (2007) The glutamate-glutamine cycle is not stoichiometric: Fates of  
508 glutamate in brain. *Journal of Neuroscience Research* 85:3347–3358.  
509 <https://doi.org/10.1002/jnr.21444>
- 510 28. Bak LK, Schousboe A, Waagepetersen HS (2006) The glutamate/GABA-glutamine  
511 cycle: aspects of transport, neurotransmitter homeostasis and ammonia transfer.  
512 *Journal of Neurochemistry* 98:641–653. [https://doi.org/10.1111/j.1471-](https://doi.org/10.1111/j.1471-4159.2006.03913.x)  
513 4159.2006.03913.x
- 514 29. Gibbs ME, Lloyd HGE, Santa T, Hertz L (2007) Glycogen is a preferred glutamate  
515 precursor during learning in 1-day-old chick: Biochemical and behavioral evidence.  
516 *Journal of Neuroscience Research* 85:3326–3333. <https://doi.org/10.1002/jnr.21307>
- 517 30. Schousboe A, Sickmann HM, Walls AB, et al (2010) Functional Importance of the  
518 Astrocytic Glycogen-Shunt and Glycolysis for Maintenance of an Intact  
519 Intra/Extracellular Glutamate Gradient. *Neurotox Res* 18:94–99.  
520 <https://doi.org/10.1007/s12640-010-9171-5>
- 521 31. Zucker RS, Regehr WG (2002) Short-Term Synaptic Plasticity. *Annu Rev Physiol*  
522 64:355–405. <https://doi.org/10.1146/annurev.physiol.64.092501.114547>
- 523 32. Suzuki A, Stern SA, Bozdagi O, et al (2011) Astrocyte-Neuron Lactate Transport Is  
524 Required for Long-Term Memory Formation. *Cell* 144:810–823.  
525 <https://doi.org/10.1016/j.cell.2011.02.018>
- 526 33. Gibbs ME, Anderson DG, Hertz L (2006) Inhibition of glycogenolysis in astrocytes  
527 interrupts memory consolidation in young chickens. *Glia* 54:214–222.  
528 <https://doi.org/10.1002/glia.20377>
- 529 34. Bak LK, Walls AB, Schousboe A, Waagepetersen HS (2018) Astrocytic glycogen  
530 metabolism in the healthy and diseased brain. *J Biol Chem* 293:7108–7116.  
531 <https://doi.org/10.1074/jbc.R117.803239>
- 532 35. DiNuzzo M, Mangia S, Maraviglia B, Giove F (2015) Does abnormal glycogen  
533 structure contribute to increased susceptibility to seizures in epilepsy? *Metab Brain*  
534 *Dis* 30:307–316. <https://doi.org/10.1007/s11011-014-9524-5>

- 535 36. DiNuzzo M, Mangia S, Maraviglia B, Giove F (2014) Physiological bases of the K<sup>+</sup>  
536 and the glutamate/GABA hypotheses of epilepsy. *Epilepsy Research* 108:995–1012.  
537 <https://doi.org/10.1016/j.eplepsyres.2014.04.001>
- 538 37. Duran J, Gruart A, López-Ramos JC, et al (2019) Glycogen in Astrocytes and  
539 Neurons: Physiological and Pathological Aspects. In: DiNuzzo M, Schousboe A (eds)  
540 *Brain Glycogen Metabolism*. Springer International Publishing, Cham, pp 311–329
- 541 38. Maglóczy Z, Freund TF (2005) Impaired and repaired inhibitory circuits in the  
542 epileptic human hippocampus. *Trends in Neurosciences* 28:334–340.  
543 <https://doi.org/10.1016/j.tins.2005.04.002>
- 544  
545

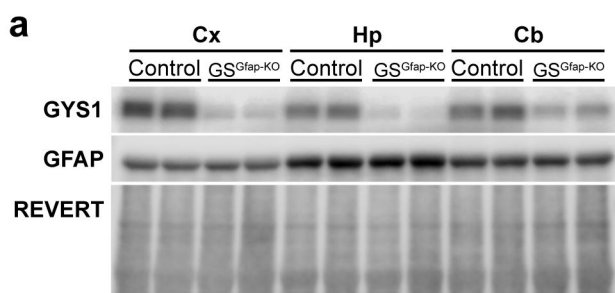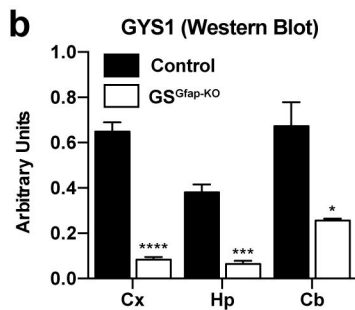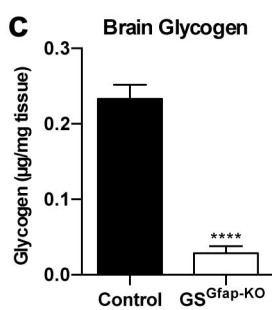

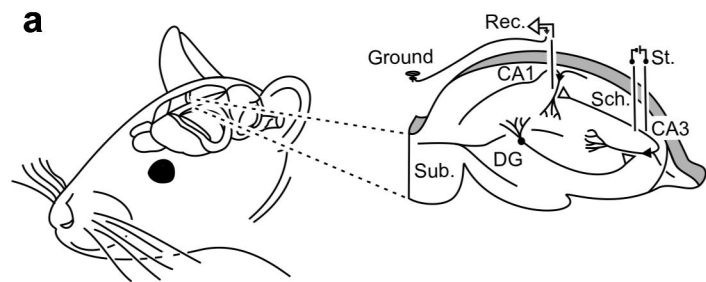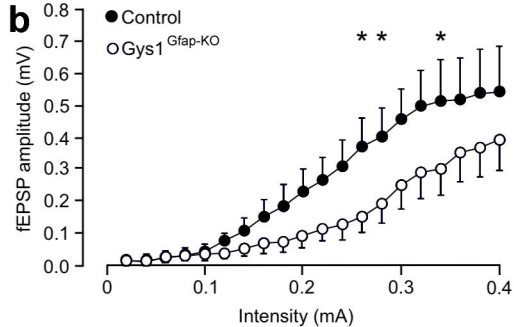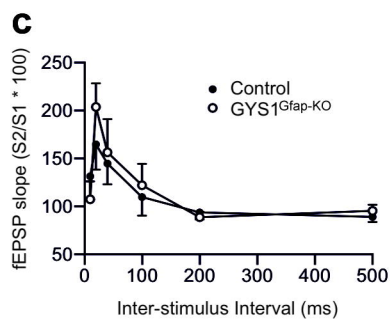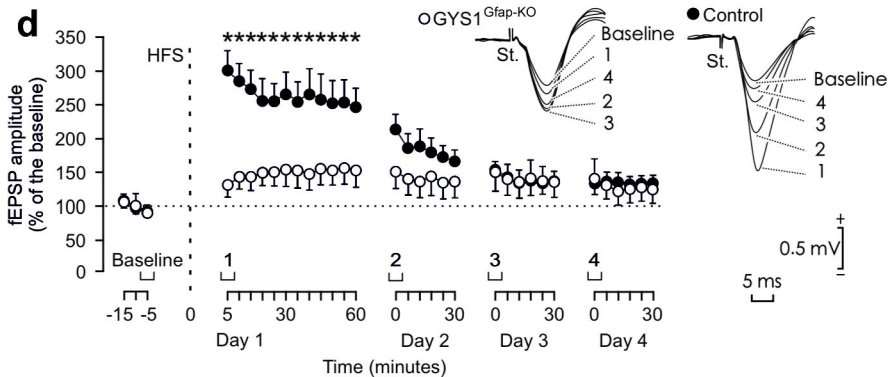



**a**

Control

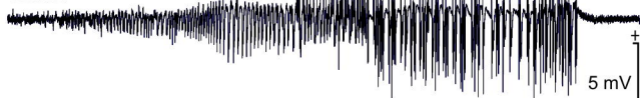GYS1<sup>Gfap-KO</sup>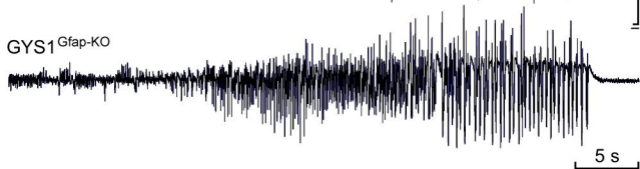**b**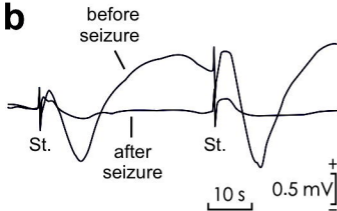**c**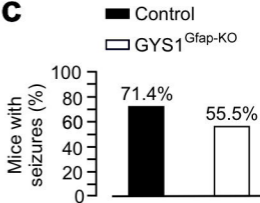

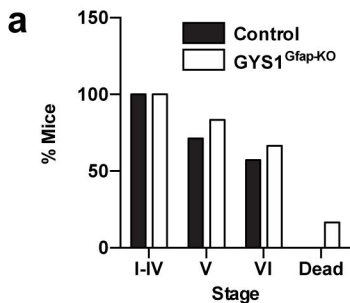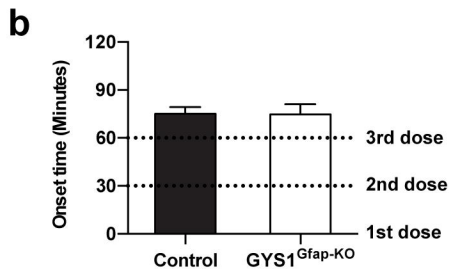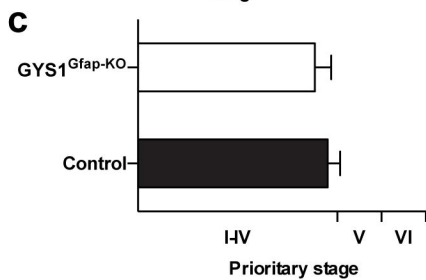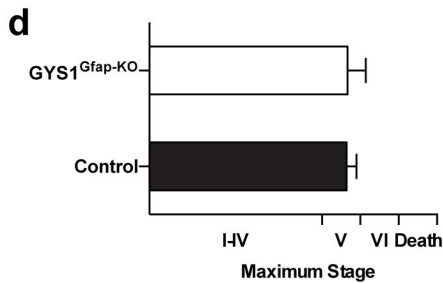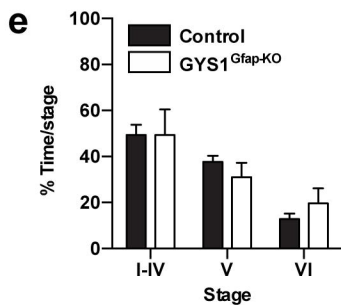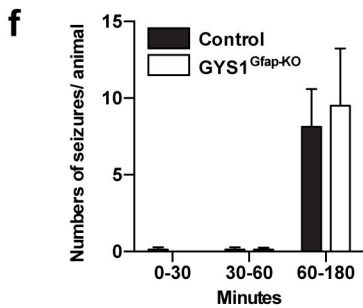

Source: https://www.biorxiv.org/content/10.1101/2020.05.06.080978v1.full.pdf
